# Supplementary material for: Naturally-occurring canine invasive urothelial carcinoma harbors luminal and basal transcriptional subtypes found in human muscle invasive bladder cancer
Source: PLoS Genet. 2018 Aug 8;14(8):e1007571. doi: 10.1371/journal.pgen.1007571 (PMC6101404; doi:10.1371/journal.pgen.1007571)
Supplement: S1 Table — (XLSX) [file pgen.1007571.s001.xlsx]

## Sheet: S1_Table
S1 Table. List of genes (n=829) used to identify basal and luminal subtypes in canine iUC samples.
Gene ID	Gene Symbol
ENSCAFG00000000008	TXNL4A
ENSCAFG00000023363	CNDP2
ENSCAFG00000023829	PMAIP1
ENSCAFG00000000116	NEDD4L
ENSCAFG00000000123	ATP8B1
ENSCAFG00000000184	MOXD1
ENSCAFG00000029442	CTGF
ENSCAFG00000000196	EYA4
ENSCAFG00000000267	TNFAIP3
ENSCAFG00000000547	FBXO5
ENSCAFG00000000577	TIAM2
ENSCAFG00000023358	SLC22A3
ENSCAFG00000000874	THBS2
ENSCAFG00000029347	PLN
ENSCAFG00000001106	LAMA2
ENSCAFG00000001136	EPB41L2
ENSCAFG00000001305	FBP1
ENSCAFG00000023269	GAS1
ENSCAFG00000001646	PRUNE2
ENSCAFG00000001778	ANXA1
ENSCAFG00000001791	ALDH1A1
ENSCAFG00000001825	TMEM2
ENSCAFG00000001867	KLF9
ENSCAFG00000001902	TJP2
ENSCAFG00000001974	KANK1
ENSCAFG00000002131	ERMP1
ENSCAFG00000002163	ROR2
ENSCAFG00000002172	DIRAS2
ENSCAFG00000002301	ECM2
ENSCAFG00000002309	OMD
ENSCAFG00000002313	OGN
ENSCAFG00000002354	TRIM28
ENSCAFG00000002620	TNNT1
ENSCAFG00000002628	EPS8L1
ENSCAFG00000002689	MBOAT7
ENSCAFG00000002886	KLK11
ENSCAFG00000029529	KLK10
ENSCAFG00000002900	KLK6
ENSCAFG00000002902	KLK5
ENSCAFG00000002923	CLEC11A
ENSCAFG00000003156	MYH14
ENSCAFG00000003485	PNKP
ENSCAFG00000003604	RRAS
ENSCAFG00000024500	PRRG2
ENSCAFG00000003620	RCN3
ENSCAFG00000003746	TRPM4
ENSCAFG00000004046	LIG1
ENSCAFG00000004095	EHD2
ENSCAFG00000004608	CLPTM1
ENSCAFG00000004651	CBLC
ENSCAFG00000004730	PLAUR
ENSCAFG00000005041	AXL
ENSCAFG00000005606	PAK4
ENSCAFG00000005948	SPINT2
ENSCAFG00000028601	ZNF345
ENSCAFG00000006665	CLIP3
ENSCAFG00000007086	LSR
ENSCAFG00000024320	FXYD5
ENSCAFG00000007614	CCNE1
ENSCAFG00000004023	ZEB1
ENSCAFG00000004529	VIM
ENSCAFG00000004682	FAM171A1
ENSCAFG00000004973	CELF2
ENSCAFG00000005169	PRKCQ
ENSCAFG00000005194	PFKFB3
ENSCAFG00000006607	DPYSL3
ENSCAFG00000006647	SPINK1
ENSCAFG00000006735	GZMA
ENSCAFG00000006753	CCNO
ENSCAFG00000007352	ADAMTS6
ENSCAFG00000007950	MAP1B
ENSCAFG00000008544	MMP15
ENSCAFG00000008782	PLLP
ENSCAFG00000009443	IRX5
ENSCAFG00000009913	ADCY7
ENSCAFG00000010588	MARCKSL1
ENSCAFG00000010930	COL16A1
ENSCAFG00000012046	IFI6
ENSCAFG00000012630	CNKSR1
ENSCAFG00000012769	MAN1C1
ENSCAFG00000012914	CLIC4
ENSCAFG00000013073	FUCA1
ENSCAFG00000030641	LYPLA2
ENSCAFG00000016233	AGMAT
ENSCAFG00000016279	CASP9
ENSCAFG00000016363	PDPN
ENSCAFG00000016422	TNFRSF1B
ENSCAFG00000008677	SSBP2
ENSCAFG00000009284	F2R
ENSCAFG00000009517	HMGCR
ENSCAFG00000010852	SYNM
ENSCAFG00000011241	SLCO3A1
ENSCAFG00000011521	AEN
ENSCAFG00000011525	ISG20
ENSCAFG00000030217	PEX11A
ENSCAFG00000014076	CTSH
ENSCAFG00000014543	SH3TC1
ENSCAFG00000015233	PROM1
ENSCAFG00000015272	FGFBP1
ENSCAFG00000015745	EVC
ENSCAFG00000015898	RBM47
ENSCAFG00000016342	PCDH7
ENSCAFG00000016498	SOD3
ENSCAFG00000016608	SLIT2
ENSCAFG00000009612	IFIT2
ENSCAFG00000009617	IFIT1
ENSCAFG00000011196	NID1
ENSCAFG00000012047	CAPN9
ENSCAFG00000013039	ZNF365
ENSCAFG00000013817	SRGN
ENSCAFG00000014050	EIF4EBP2
ENSCAFG00000014071	PRF1
ENSCAFG00000014100	SGPL1
ENSCAFG00000014104	PCBD1
ENSCAFG00000015161	CAMK2G
ENSCAFG00000015698	ZCCHC24
ENSCAFG00000015872	TSPAN14
ENSCAFG00000016086	MMRN2
ENSCAFG00000016091	SNCG
ENSCAFG00000016731	MSX2
ENSCAFG00000016856	STK10
ENSCAFG00000016945	GABRP
ENSCAFG00000016956	KCNMB1
ENSCAFG00000017082	WWC1
ENSCAFG00000017260	ATP10B
ENSCAFG00000017275	FABP6
ENSCAFG00000017357	ADAM19
ENSCAFG00000017846	ATOX1
ENSCAFG00000017855	SPARC
ENSCAFG00000017907	GM2A
ENSCAFG00000018101	CD74
ENSCAFG00000018391	LITAF
ENSCAFG00000018465	PARP8
ENSCAFG00000018579	GHR
ENSCAFG00000029613	AMACR
ENSCAFG00000019081	MYO10
ENSCAFG00000031644	FBXL7
ENSCAFG00000009810	JAM3
ENSCAFG00000009907	NTM
ENSCAFG00000009993	ST14
ENSCAFG00000010199	NFRKB
ENSCAFG00000010386	ST3GAL4
ENSCAFG00000011745	SORL1
ENSCAFG00000011805	SC5D
ENSCAFG00000029265	THY1
ENSCAFG00000012079	MCAM
ENSCAFG00000013162	TAGLN
ENSCAFG00000030573	NNMT
ENSCAFG00000014074	CRYAB
ENSCAFG00000015054	MMP1
ENSCAFG00000015105	BIRC3
ENSCAFG00000016124	CLDN7
ENSCAFG00000016618	TNFSF12
ENSCAFG00000016641	CD68
ENSCAFG00000016984	PER1
ENSCAFG00000018012	TRPV2
ENSCAFG00000018195	SLC47A1
ENSCAFG00000030269	MFAP4
ENSCAFG00000018436	SREBF1
ENSCAFG00000018635	ROR1
ENSCAFG00000019142	LRP8
ENSCAFG00000019381	PRKCZ
ENSCAFG00000019574	ACOT7
ENSCAFG00000019673	TNFRSF9
ENSCAFG00000019732	SPSB1
ENSCAFG00000019943	CRISPLD2
ENSCAFG00000019952	ATP2C2
ENSCAFG00000020252	NQO1
ENSCAFG00000020305	CDH1
ENSCAFG00000020320	ESRP2
ENSCAFG00000020355	CTCF
ENSCAFG00000020364	TPPP3
ENSCAFG00000020425	CDH11
ENSCAFG00000012523	CLDN4
ENSCAFG00000012532	CLDN3
ENSCAFG00000013467	POR
ENSCAFG00000013651	UPK3B
ENSCAFG00000014322	PCOLCE
ENSCAFG00000031298	ZKSCAN1
ENSCAFG00000016896	TGFB1I1
ENSCAFG00000016881	ITGAM
ENSCAFG00000017104	GDPD3
ENSCAFG00000017122	SULT1A1
ENSCAFG00000017216	TUFM
ENSCAFG00000017643	ERN2
ENSCAFG00000017687	SCNN1B
ENSCAFG00000017728	CDR2
ENSCAFG00000031060	LYRM1
ENSCAFG00000017952	ACSM3
ENSCAFG00000019134	PPL
ENSCAFG00000019764	DENND2D
ENSCAFG00000019985	COL11A1
ENSCAFG00000020104	CNN3
ENSCAFG00000020112	ABCD3
ENSCAFG00000020155	GFI1
ENSCAFG00000020179	TGFBR3
ENSCAFG00000020273	ZNHIT6
ENSCAFG00000020276	CYR61
ENSCAFG00000029993	DDAH1
ENSCAFG00000020342	IFI44
ENSCAFG00000020343	IFI44L
ENSCAFG00000020357	DNAJB4
ENSCAFG00000020386	ST6GALNAC5
ENSCAFG00000010298	ADORA1
ENSCAFG00000010602	ELF3
ENSCAFG00000029227	CSRP1
ENSCAFG00000030784	LAD1
ENSCAFG00000029682	C1orf106
ENSCAFG00000011432	MAPKAPK2
ENSCAFG00000011466	IL24
ENSCAFG00000011523	C1orf116
ENSCAFG00000012120	TRAF5
ENSCAFG00000030416	RGS16
ENSCAFG00000013490	FAM129A
ENSCAFG00000014587	TNFSF4
ENSCAFG00000014982	FMO1
ENSCAFG00000014986	FMO2
ENSCAFG00000015002	PRRX1
ENSCAFG00000015259	DPT
ENSCAFG00000015806	AKT3
ENSCAFG00000016154	TMEM63A
ENSCAFG00000016750	RRNAD1
ENSCAFG00000016769	NES
ENSCAFG00000016866	RAB25
ENSCAFG00000016877	UBQLN4
ENSCAFG00000016917	SYT11
ENSCAFG00000024466	EFNA4
ENSCAFG00000017197	ATP8B2
ENSCAFG00000017548	S100A3
ENSCAFG00000017553	S100A6
ENSCAFG00000017557	S100A8
ENSCAFG00000017664	SLC14A1
ENSCAFG00000017942	MAPRE2
ENSCAFG00000018046	TTR
ENSCAFG00000018115	CDH2
ENSCAFG00000014108	OSBPL1A
ENSCAFG00000018173	LAMA3
ENSCAFG00000018183	NPC1
ENSCAFG00000018331	COLEC12
ENSCAFG00000018351	ENOSF1
ENSCAFG00000018427	EMILIN2
ENSCAFG00000018639	PTPRM
ENSCAFG00000018707	RALBP1
ENSCAFG00000018727	RAB31
ENSCAFG00000010686	NLRP3
ENSCAFG00000010958	RIN3
ENSCAFG00000025462	DHRS2
ENSCAFG00000011868	PCK2
ENSCAFG00000011966	PSME2
ENSCAFG00000012182	TGM1
ENSCAFG00000013743	FOXA1
ENSCAFG00000014184	MGAT2
ENSCAFG00000014701	PTGER2
ENSCAFG00000014843	FERMT2
ENSCAFG00000014897	CDKN3
ENSCAFG00000014940	SAMD4A
ENSCAFG00000015578	RTN1
ENSCAFG00000032183	SGPP1
ENSCAFG00000016048	PLEKHG3
ENSCAFG00000016497	ZFP36L1
ENSCAFG00000016534	ACTN1
ENSCAFG00000017101	TGFB3
ENSCAFG00000017329	FLRT2
ENSCAFG00000017646	SERPINA1
ENSCAFG00000017675	SERPINA3
ENSCAFG00000017906	WARS
ENSCAFG00000018075	TRAF3
ENSCAFG00000018398	CDCA4
ENSCAFG00000029644	GPR132
ENSCAFG00000006054	SLC16A3
ENSCAFG00000006006	FASN
ENSCAFG00000005952	DUS1L
ENSCAFG00000005891	SIRT7
ENSCAFG00000005859	P4HB
ENSCAFG00000005306	SOCS3
ENSCAFG00000005252	TMC6
ENSCAFG00000005021	EVPL
ENSCAFG00000005007	CDK3
ENSCAFG00000004989	ACOX1
ENSCAFG00000004816	LLGL2
ENSCAFG00000004741	GGA3
ENSCAFG00000004719	ARMC7
ENSCAFG00000004718	SLC16A5
ENSCAFG00000004556	GPRC5C
ENSCAFG00000004374	SOX9
ENSCAFG00000013494	NSF
ENSCAFG00000013256	MRC2
ENSCAFG00000014624	IFI35
ENSCAFG00000014854	CNTNAP1
ENSCAFG00000015912	JUP
ENSCAFG00000031250	KRT14
ENSCAFG00000023647	KRT19
ENSCAFG00000016004	KRT12
ENSCAFG00000016328	GRB7
ENSCAFG00000016351	ERBB2
ENSCAFG00000016359	PGAP3
ENSCAFG00000016816	PRR15L
ENSCAFG00000016819	CDK5RAP3
ENSCAFG00000016854	HOXB6
ENSCAFG00000016926	PHB
ENSCAFG00000017018	COL1A1
ENSCAFG00000017080	EPN3
ENSCAFG00000017140	TOB1
ENSCAFG00000017340	TOM1L1
ENSCAFG00000029757	MMD
ENSCAFG00000017513	MTMR4
ENSCAFG00000017745	TBX2
ENSCAFG00000017829	CA4
ENSCAFG00000017996	ACACA
ENSCAFG00000018150	HNF1B
ENSCAFG00000018349	CCL2
ENSCAFG00000018466	ADAP2
ENSCAFG00000018650	NLK
ENSCAFG00000018655	TMEM97
ENSCAFG00000018800	TRAF4
ENSCAFG00000024189	SERPINF1
ENSCAFG00000030397	NACC2
ENSCAFG00000019953	NCS1
ENSCAFG00000020082	DNM1
ENSCAFG00000020125	STXBP1
ENSCAFG00000020166	ANGPTL2
ENSCAFG00000020201	RABEPK
ENSCAFG00000020208	GOLGA1
ENSCAFG00000000082	CDK2
ENSCAFG00000000087	RAB5B
ENSCAFG00000030801	IKZF4
ENSCAFG00000000097	ERBB3
ENSCAFG00000000337	PPM1H
ENSCAFG00000000408	IFNG
ENSCAFG00000000752	CERK
ENSCAFG00000000804	FBLN1
ENSCAFG00000000838	FAM118A
ENSCAFG00000000843	UPK3A
ENSCAFG00000000850	KIAA0930
ENSCAFG00000001051	CSDC2
ENSCAFG00000001172	SGSM3
ENSCAFG00000001337	SYNGR1
ENSCAFG00000001487	LGALS1
ENSCAFG00000001516	TST
ENSCAFG00000001526	IFT27
ENSCAFG00000001944	TXNRD1
ENSCAFG00000002162	MAP4K4
ENSCAFG00000023414	CNNM3
ENSCAFG00000002653	EPCAM
ENSCAFG00000002919	EFEMP1
ENSCAFG00000003175	AFTPH
ENSCAFG00000003276	ANTXR1
ENSCAFG00000012938	MGAT1
ENSCAFG00000000433	GFPT2
ENSCAFG00000000348	CANX
ENSCAFG00000000334	ADAMTS2
ENSCAFG00000000219	TRIM36
ENSCAFG00000000203	AP3S1
ENSCAFG00000000158	HSD17B4
ENSCAFG00000000510	PRR16
ENSCAFG00000015452	ARL6IP1
ENSCAFG00000028461	LOX
ENSCAFG00000000522	SNCAIP
ENSCAFG00000000830	PDLIM4
ENSCAFG00000000840	SLC22A4
ENSCAFG00000024900	SLC22A5
ENSCAFG00000000851	IRF1
ENSCAFG00000001065	PITX1
ENSCAFG00000032668	SPOCK1
ENSCAFG00000001460	PTPRD
ENSCAFG00000001562	BNC2
ENSCAFG00000001807	DDX58
ENSCAFG00000001843	SPINK4
ENSCAFG00000001844	BAG1
ENSCAFG00000001965	DNAJB5
ENSCAFG00000002049	RUSC2
ENSCAFG00000002086	TPM2
ENSCAFG00000002154	TLN1
ENSCAFG00000002281	RECK
ENSCAFG00000002400	ALDH1B1
ENSCAFG00000003426	TNC
ENSCAFG00000003516	TRIM32
ENSCAFG00000003663	GSN
ENSCAFG00000000448	DDR1
ENSCAFG00000000658	SLC44A4
ENSCAFG00000000829	PSMB8
ENSCAFG00000000832	TAP1
ENSCAFG00000001382	MAPK13
ENSCAFG00000029359	KCNK5
ENSCAFG00000001565	DAAM2
ENSCAFG00000002196	MCM3
ENSCAFG00000002288	GCLC
ENSCAFG00000002459	RAB23
ENSCAFG00000030132	ELOVL4
ENSCAFG00000002951	SNAP91
ENSCAFG00000003116	BACH2
ENSCAFG00000003421	FUT9
ENSCAFG00000028591	POPDC3
ENSCAFG00000003694	PRDM1
ENSCAFG00000003995	FYN
ENSCAFG00000004043	LAMA4
ENSCAFG00000000555	RNF19A
ENSCAFG00000028923	ANKRD46
ENSCAFG00000000567	PABPC1
ENSCAFG00000000587	GRHL2
ENSCAFG00000000693	ANGPT1
ENSCAFG00000001093	FAM49B
ENSCAFG00000001131	SLA
ENSCAFG00000001217	PTK2
ENSCAFG00000001228	DENND3
ENSCAFG00000032433	PSCA
ENSCAFG00000001289	LY6E
ENSCAFG00000001372	SCRIB
ENSCAFG00000001607	SLC39A4
ENSCAFG00000001792	LIMCH1
ENSCAFG00000001903	ATP10D
ENSCAFG00000002014	USP46
ENSCAFG00000025473	CPA4
ENSCAFG00000001585	FLNC
ENSCAFG00000001757	GPR37
ENSCAFG00000001898	CDK14
ENSCAFG00000001998	CDK6
ENSCAFG00000002046	GNG11
ENSCAFG00000002069	COL1A2
ENSCAFG00000002257	ICA1
ENSCAFG00000002420	MEOX2
ENSCAFG00000002437	AGR2
ENSCAFG00000002498	HDAC9
ENSCAFG00000002825	DFNA5
ENSCAFG00000003005	CREB5
ENSCAFG00000003017	CPVL
ENSCAFG00000003404	CAV1
ENSCAFG00000032267	WNT2
ENSCAFG00000003492	CPED1
ENSCAFG00000003510	PTPRZ1
ENSCAFG00000003210	FHL3
ENSCAFG00000032454	COL8A2
ENSCAFG00000024306	AGO4
ENSCAFG00000003730	GPX7
ENSCAFG00000004033	PDZK1IP1
ENSCAFG00000005069	PTPRF
ENSCAFG00000005431	RNASE1
ENSCAFG00000005688	PHLDA1
ENSCAFG00000023594	CSRP2
ENSCAFG00000005779	PPP1R12A
ENSCAFG00000005817	LIN7A
ENSCAFG00000006129	EPYC
ENSCAFG00000006142	DCN
ENSCAFG00000006273	FGD6
ENSCAFG00000006454	ELK3
ENSCAFG00000007304	IGF1
ENSCAFG00000007789	ARHGAP10
ENSCAFG00000007907	LRBA
ENSCAFG00000008591	TDO2
ENSCAFG00000008844	KLHL2
ENSCAFG00000008861	CPE
ENSCAFG00000009003	DDX60
ENSCAFG00000009013	BTC
ENSCAFG00000003169	CALD1
ENSCAFG00000004555	RARRES2
ENSCAFG00000029424	REPIN1
ENSCAFG00000031409	TMEM176A
ENSCAFG00000005750	IDO1
ENSCAFG00000006176	RAB11FIP1
ENSCAFG00000006503	RBPMS
ENSCAFG00000029034	PDLIM3
ENSCAFG00000007906	WWC2
ENSCAFG00000008409	VEGFC
ENSCAFG00000003200	SH3YL1
ENSCAFG00000003293	RSAD2
ENSCAFG00000004267	HADHA
ENSCAFG00000004662	EMILIN1
ENSCAFG00000007047	MAL
ENSCAFG00000007073	ACOXL
ENSCAFG00000007200	SLC20A1
ENSCAFG00000032004	C2orf68
ENSCAFG00000007720	GGCX
ENSCAFG00000007832	TCF7L1
ENSCAFG00000007875	TMSB10
ENSCAFG00000008478	MOGS
ENSCAFG00000008756	ACTG2
ENSCAFG00000009334	OLFML3
ENSCAFG00000009765	CASQ2
ENSCAFG00000010096	HMGCS2
ENSCAFG00000010883	FMO5
ENSCAFG00000011059	ACP6
ENSCAFG00000011777	APH1A
ENSCAFG00000013729	OVGP1
ENSCAFG00000003535	GLI3
ENSCAFG00000003646	SFRP4
ENSCAFG00000003992	NAMPT
ENSCAFG00000025345	RELN
ENSCAFG00000004274	LRRC17
ENSCAFG00000030025	FGL2
ENSCAFG00000006212	SEMA3A
ENSCAFG00000024796	RNH1
ENSCAFG00000006528	RASSF7
ENSCAFG00000006825	PRR5L
ENSCAFG00000024167	FJX1
ENSCAFG00000028508	CD59
ENSCAFG00000007838	SERPING1
ENSCAFG00000007839	UBE2L6
ENSCAFG00000008656	MADD
ENSCAFG00000009441	CD82
ENSCAFG00000010077	LSP1
ENSCAFG00000010099	TH
ENSCAFG00000010424	DHCR7
ENSCAFG00000011210	UNC93B1
ENSCAFG00000028875	CD248
ENSCAFG00000013132	FOSL1
ENSCAFG00000013285	OVOL1
ENSCAFG00000013951	TM7SF2
ENSCAFG00000016390	SLC15A3
ENSCAFG00000003962	FAT4
ENSCAFG00000004213	ARHGEF4
ENSCAFG00000004355	LIMS2
ENSCAFG00000004788	TFCP2L1
ENSCAFG00000004821	GLI2
ENSCAFG00000004844	RALB
ENSCAFG00000004913	MARCO
ENSCAFG00000005466	KYNU
ENSCAFG00000005497	ZEB2
ENSCAFG00000005610	KIF5C
ENSCAFG00000005660	TNFAIP6
ENSCAFG00000003807	KLF15
ENSCAFG00000004093	MGLL
ENSCAFG00000004987	TSEN2
ENSCAFG00000004991	PPARG
ENSCAFG00000005459	MTMR14
ENSCAFG00000005570	LMCD1
ENSCAFG00000005958	SETMAR
ENSCAFG00000030541	PDZRN3
ENSCAFG00000006496	MITF
ENSCAFG00000008211	CACNA2D3
ENSCAFG00000008689	PRKCD
ENSCAFG00000009881	ALAS1
ENSCAFG00000029245	ABHD14A
ENSCAFG00000010590	NPRL2
ENSCAFG00000010804	SEMA3F
ENSCAFG00000011489	AMT
ENSCAFG00000011992	WDR6
ENSCAFG00000013136	SMARCC1
ENSCAFG00000014068	ZDHHC3
ENSCAFG00000014244	NDUFA13
ENSCAFG00000014578	UPF1
ENSCAFG00000014817	ISYNA1
ENSCAFG00000014891	PGPEP1
ENSCAFG00000014900	LSM4
ENSCAFG00000015192	B3GNT3
ENSCAFG00000015487	NR2F6
ENSCAFG00000016147	SYDE1
ENSCAFG00000016295	GIPC1
ENSCAFG00000017009	NFIX
ENSCAFG00000017183	HOOK2
ENSCAFG00000017319	ACP5
ENSCAFG00000017584	SMARCA4
ENSCAFG00000017651	DNM2
ENSCAFG00000017746	AP1M2
ENSCAFG00000017958	COL5A3
ENSCAFG00000018306	STXBP2
ENSCAFG00000018322	LRRC8E
ENSCAFG00000019070	CHAF1A
ENSCAFG00000019095	STAP2
ENSCAFG00000019197	TJP3
ENSCAFG00000019217	MFSD12
ENSCAFG00000019293	TLE2
ENSCAFG00000004402	PRSS23
ENSCAFG00000004407	ME3
ENSCAFG00000005179	CAPN5
ENSCAFG00000005628	P2RY6
ENSCAFG00000006444	TRIM3
ENSCAFG00000006488	ILK
ENSCAFG00000006740	OLFML1
ENSCAFG00000007092	SCUBE2
ENSCAFG00000007845	DKK3
ENSCAFG00000007895	PARVA
ENSCAFG00000008095	ARNTL
ENSCAFG00000009431	E2F8
ENSCAFG00000010218	KIF18A
ENSCAFG00000004491	LCP1
ENSCAFG00000005037	KLF5
ENSCAFG00000005500	UGGT2
ENSCAFG00000005918	ITGBL1
ENSCAFG00000006334	GRTP1
ENSCAFG00000006421	GAS6
ENSCAFG00000004453	ABHD5
ENSCAFG00000004630	FBXL2
ENSCAFG00000004931	PLCD1
ENSCAFG00000005080	GORASP1
ENSCAFG00000005257	VIPR1
ENSCAFG00000005390	DYNC1LI1
ENSCAFG00000005873	RFTN1
ENSCAFG00000007441	SLC35G2
ENSCAFG00000007731	ATP1B3
ENSCAFG00000007863	ATR
ENSCAFG00000007897	PLS1
ENSCAFG00000007915	PCOLCE2
ENSCAFG00000008159	PLSCR4
ENSCAFG00000008235	CPA3
ENSCAFG00000008902	PTX3
ENSCAFG00000005453	OVOL2
ENSCAFG00000005627	JAG1
ENSCAFG00000005690	LAMP5
ENSCAFG00000008085	ERGIC3
ENSCAFG00000008413	EPB41L1
ENSCAFG00000008540	MYL9
ENSCAFG00000008869	TGM2
ENSCAFG00000009591	TOMM34
ENSCAFG00000009905	MMP9
ENSCAFG00000010313	ELMO2
ENSCAFG00000010640	SLC2A10
ENSCAFG00000010734	ZMYND8
ENSCAFG00000031326	CEBPB
ENSCAFG00000011572	KCNG1
ENSCAFG00000011813	ZNF217
ENSCAFG00000011825	BCAS1
ENSCAFG00000023783	ZBP1
ENSCAFG00000031382	PMEPA1
ENSCAFG00000012333	PPP1R3D
ENSCAFG00000005998	LHFP
ENSCAFG00000006073	POSTN
ENSCAFG00000006189	CCNA1
ENSCAFG00000024936	MTUS2
ENSCAFG00000007146	SACS
ENSCAFG00000007492	PALLD
ENSCAFG00000007853	SAP30
ENSCAFG00000007857	SCRG1
ENSCAFG00000007948	FDFT1
ENSCAFG00000008293	FZD3
ENSCAFG00000008813	PNMA2
ENSCAFG00000008969	KCTD9
ENSCAFG00000009371	SORBS3
ENSCAFG00000030640	PID1
ENSCAFG00000010732	CAB39
ENSCAFG00000012226	COL6A3
ENSCAFG00000012433	PER2
ENSCAFG00000008401	P2RX7
ENSCAFG00000008601	SH2B3
ENSCAFG00000009906	VSIG10
ENSCAFG00000011823	MN1
ENSCAFG00000012067	AP1B1
ENSCAFG00000030931	LIF
ENSCAFG00000012827	TCN2
ENSCAFG00000012922	SMTN
ENSCAFG00000014117	MMP11
ENSCAFG00000023963	SLC25A1
ENSCAFG00000015654	PAPSS2
ENSCAFG00000015708	ACTA2
ENSCAFG00000015712	FAS
ENSCAFG00000006491	ITGA5
ENSCAFG00000007035	MFSD5
ENSCAFG00000025220	ACVRL1
ENSCAFG00000007758	GALNT6
ENSCAFG00000007902	SLC11A2
ENSCAFG00000008400	TMBIM6
ENSCAFG00000008857	CACNB3
ENSCAFG00000009069	TMEM106C
ENSCAFG00000009872	CNTN1
ENSCAFG00000010680	DENND5B
ENSCAFG00000010955	PTHLH
ENSCAFG00000011838	ST8SIA1
ENSCAFG00000031280	KCNJ8
ENSCAFG00000012256	GOLT1B
ENSCAFG00000012373	SLCO1B3
ENSCAFG00000012789	PTPRO
ENSCAFG00000013459	KLRD1
ENSCAFG00000013504	CLEC7A
ENSCAFG00000013892	MFAP5
ENSCAFG00000013918	SLC2A3
ENSCAFG00000014220	C1R
ENSCAFG00000014346	C1S
ENSCAFG00000014412	LPCAT3
ENSCAFG00000015047	IFFO1
ENSCAFG00000015203	PLEKHG6
ENSCAFG00000015381	CCND2
ENSCAFG00000006568	ARHGAP22
ENSCAFG00000006948	ALOX5
ENSCAFG00000007026	CXCL12
ENSCAFG00000007985	PLCE1
ENSCAFG00000008099	CYP2C18
ENSCAFG00000008270	SORBS1
ENSCAFG00000009271	CRTAC1
ENSCAFG00000009663	SCD
ENSCAFG00000010155	NFKB2
ENSCAFG00000010367	INA
ENSCAFG00000010960	ZDHHC6
ENSCAFG00000011876	HSPA12A
ENSCAFG00000007034	LYN
ENSCAFG00000007137	TOX
ENSCAFG00000007167	CHD7
ENSCAFG00000030126	CRH
ENSCAFG00000007516	ARFGEF1
ENSCAFG00000032483	LY96
ENSCAFG00000008193	PI15
ENSCAFG00000008310	ZFHX4
ENSCAFG00000008350	PKIA
ENSCAFG00000009078	RUNX1T1
ENSCAFG00000031938	GEM
ENSCAFG00000009305	ESRP1
ENSCAFG00000012181	ACTC1
ENSCAFG00000009632	TYRO3
ENSCAFG00000011917	TMEM62
ENSCAFG00000032191	MAP1A
ENSCAFG00000013633	B2M
ENSCAFG00000014548	FBN1
ENSCAFG00000015048	SLC27A2
ENSCAFG00000015680	MYO5C
ENSCAFG00000016686	ANXA2
ENSCAFG00000016966	TPM1
ENSCAFG00000017107	PLEKHO2
ENSCAFG00000017123	RASL12
ENSCAFG00000017138	CILP
ENSCAFG00000017255	RAB11A
ENSCAFG00000017332	SMAD6
ENSCAFG00000017616	LARP6
ENSCAFG00000017866	ISLR
ENSCAFG00000017937	CYP1A1
ENSCAFG00000017941	CYP1A2
ENSCAFG00000018001	NEIL1
ENSCAFG00000030120	CSPG4
ENSCAFG00000018073	PSTPIP1
ENSCAFG00000008215	USP25
ENSCAFG00000008482	JAM2
ENSCAFG00000008557	APP
ENSCAFG00000008853	TIAM1
ENSCAFG00000008998	C21orf59
ENSCAFG00000025084	PAXBP1
ENSCAFG00000009679	CLDN14
ENSCAFG00000009817	KCNJ15
ENSCAFG00000010190	TMPRSS2
ENSCAFG00000010228	C2CD2
ENSCAFG00000010349	TFF2
ENSCAFG00000010450	SLC37A1
ENSCAFG00000010642	CSTB
ENSCAFG00000010846	PFKL
ENSCAFG00000011039	ITGB2
ENSCAFG00000011898	SLC19A1
ENSCAFG00000011911	COL6A1
ENSCAFG00000008584	CXCL10
ENSCAFG00000008685	CCNG2
ENSCAFG00000008837	ANXA3
ENSCAFG00000028708	SCD5
ENSCAFG00000030068	PLAC8
ENSCAFG00000009094	HPSE
ENSCAFG00000009320	ARHGAP24
ENSCAFG00000009396	MAPK10
ENSCAFG00000009569	SPP1
ENSCAFG00000009781	HERC6
ENSCAFG00000009840	FAM13A
ENSCAFG00000011549	ELOVL6
ENSCAFG00000011769	ANK2
ENSCAFG00000008741	EPHA3
ENSCAFG00000009242	FILIP1L
ENSCAFG00000009887	CD47
ENSCAFG00000010735	GRAMD1C
ENSCAFG00000010905	B4GALT4
ENSCAFG00000011172	FSTL1
ENSCAFG00000012119	MYLK
ENSCAFG00000012555	SLC12A8
ENSCAFG00000014327	B3GALNT1
ENSCAFG00000014473	BCHE
ENSCAFG00000009276	SERPINB1
ENSCAFG00000009314	NQO2
ENSCAFG00000009409	ECI2
ENSCAFG00000009509	F13A1
ENSCAFG00000009533	SSR1
ENSCAFG00000009832	GFOD1
ENSCAFG00000009903	MYLIP
ENSCAFG00000009934	ATXN1
ENSCAFG00000009977	CAP2
ENSCAFG00000024883	SOX4
ENSCAFG00000010366	ALDH5A1
ENSCAFG00000011100	PRSS16
ENSCAFG00000012020	TRIM27
ENSCAFG00000009943	TANK
ENSCAFG00000010438	IFIH1
ENSCAFG00000012890	HAT1
ENSCAFG00000013332	ATF2
ENSCAFG00000013522	AGPS
ENSCAFG00000014597	ITGAV
ENSCAFG00000014796	GULP1
ENSCAFG00000014812	COL3A1
ENSCAFG00000014837	COL5A2
ENSCAFG00000010080	MYO1B
ENSCAFG00000032750	NABP1
ENSCAFG00000010652	STK17B
ENSCAFG00000013191	NRP2
ENSCAFG00000013414	ADAM23
ENSCAFG00000014575	TNS1
ENSCAFG00000015209	TUBA4A
ENSCAFG00000015475	DES
ENSCAFG00000015503	SPEG
ENSCAFG00000023427	KCNE4
ENSCAFG00000016186	SCG2
ENSCAFG00000016228	SERPINE2
ENSCAFG00000009459	FMOD
ENSCAFG00000009649	PLEKHA6
ENSCAFG00000009661	PIK3C2B
ENSCAFG00000010206	CTSE
ENSCAFG00000010927	BPNT1
ENSCAFG00000013180	DDR2
ENSCAFG00000013079	OLFML2B
ENSCAFG00000031128	B4GALT3
ENSCAFG00000012773	USP21
ENSCAFG00000012569	CD84
ENSCAFG00000012510	PEX19
ENSCAFG00000012470	CASQ1
ENSCAFG00000011706	MNDA
ENSCAFG00000011401	KIRREL
ENSCAFG00000011799	GPM6B
ENSCAFG00000012847	PPEF1
ENSCAFG00000029284	SAT1
ENSCAFG00000014435	MAOA
ENSCAFG00000014451	MAOB
ENSCAFG00000015519	WAS
ENSCAFG00000016633	HEPH
ENSCAFG00000028978	IL2RG
ENSCAFG00000017241	PDLIM7
ENSCAFG00000017401	POF1B
ENSCAFG00000017468	NAP1L3
ENSCAFG00000029920	TSC22D3
ENSCAFG00000018117	CHRDL1
ENSCAFG00000018287	WDR44
ENSCAFG00000018359	IL13RA1
ENSCAFG00000018864	GPC3
ENSCAFG00000018932	FHL1
ENSCAFG00000018936	MAP7D3
ENSCAFG00000018944	VGLL1
ENSCAFG00000019116	MAMLD1
ENSCAFG00000019245	BCAP31
ENSCAFG00000019362	L1CAM
ENSCAFG00000019408	ARHGAP4
ENSCAFG00000019521	FLNA
ENSCAFG00000019631	F8
